1 TITLE: A pipeline for assessing the quality of images and metadata from crowd-sourced databases.

2 AUTHORS: J. Billotte

3 TARGET JOURNAL: Methods in Ecology and Evolution

4 ABSTRACT

5 Crowd-sourced biodiversity databases provide easy access to data and images for ecological education  
6 and research. One concern with using publicly sourced databases; however, is the quality of their  
7 images, taxonomic descriptions, and geographical metadata. To address this concern and allow  
8 researchers and educators to make informed decisions about using crowd-sourced data, I developed a  
9 suite of pipelines to evaluate taxonomic consistency, how well geo-tagging fits known distributions, and  
10 image quality of crowd-sourced biodiversity data of the order Araneae (spiders) from iNaturalist. This  
11 pipeline allows users to analyze multiple images from iNaturalist and their associated metadata; to  
12 determine the level of taxonomic identification (family, genera, species) for each occurrence; whether  
13 the taxonomy label for an image matches accepted nesting of families, genera, and species; and  
14 whether geo-tags match the distribution of the taxon described using occurrence data from the Global  
15 Biodiversity Infrastructure Facility (GBIF) as a reference. Additionally, I assessed image quality with the  
16 MatLab algorithm, BRISQUE. I used entries from the order Araneae (spiders) as a case study. At the time  
17 of my analyses (July 2021), I found that iNaturalist contained at least one observation for 124 of the 129  
18 families of Araneae, and 115 families had three or more unique observations, with relatively similar  
19 quality of metadata and image quality across families. Taxonomic consistency was similar for  
20 observations identified at the genus and species level, but lower in observations with only family level  
21 identification. Observations with species level identifications had higher precision for geo-tags  
22 compared to those identified to the family or genus level and the highest image quality according to the  
23 BRISQUE scores. Overall, the results suggest that iNaturalist can provide large metadata and images sets

24 for research. Given the inevitability of some low-quality observations, this pipeline provides a valuable  
25 resource for researchers and educators to evaluate the quality of iNaturalist and other crowd-sourced  
26 data.

27 Keywords: *biodiversity, iNaturalist, GBIF, metadata, pipeline, database, community science*

## 28 INTRODUCTION

29 In the past ten years, biodiversity, conservation, and taxonomical research has increasingly utilized  
30 community science initiatives, including virtual platforms of user-uploaded biodiversity observations  
31 (Ryan et al., 2018; Cull, 2021; Mesaglio & Callaghan, 2021). These large, crowd-sourced biodiversity  
32 databases contribute to scientific advancement, with posted observations providing evidence of  
33 unknown species, surveillance of field sites, and newly documented animal behaviors (Wilson, Pan,  
34 David, General, & Koch, 2020). For animal groups that are difficult to locate in the wild or whose  
35 collection would prove too time consuming and costly, crowd sourced observations could provide  
36 information on species ranges or invasions. For example, the first occurrence of *Pseudeuophrys erratica*  
37 (Araneae: Salticidae: Euophryini), outside its native range was documented by non-experts on  
38 biodiversity databases (Kaldari, 2019). Since observations from crowd-sourced data are usually  
39 accompanied by geographic information, comparison of these observations against known ranges can  
40 help highlight observations made well outside the known range. Streamlining the use of free and crowd-  
41 sourced biodiversity databases could make detection of new species faster and more efficient.

42 iNaturalist, one such crowd-sourced biodiversity database, provides a large platform for gathering  
43 global biodiversity data. Founded in 2008 by Nate Agrin, Jessica Kline, and Ken-ichi Ueda as part of a  
44 graduate school project for the University of California, Berkeley School of Informatics Master's project  
45 (Agrin, Kline, & Ueda, 2014), iNaturalist has grown in popularity, and now contains more than 68 million  
46 observations. Using iNaturalist and its accompanying mobile app, users can post images of organisms

47 and provide a geo-tagged location for that observation. Once a user posts an image, an image-based,  
48 machine learning algorithm suggests a taxonomic identification. Users can then vote in agreement with  
49 that identification or suggest an alternative identification until one proposed taxonomy receives enough  
50 votes for general acceptance. The program labels observations with agreed upon taxonomic  
51 identification and higher quality images as “Research grade” (Agrin et al., 2014).

52 Like iNaturalist, the Global Biodiversity Information Facility (GBIF) is an open-access infrastructure that  
53 provides observational data of species using a range of published sources (Michonneau & Paulay, 2014;  
54 ‘What is GBIF?’, 2021). The observation records from GBIF come from participating institutions and  
55 publications. The curated data are available publicly, but unlike iNaturalist, contributions are limited to  
56 only approved organizations, making the data, in theory, more robust (‘What is GBIF?’, 2021), but also  
57 more limited.

58 Image and metadata quality remains a concern when using crowd-sourced data (Moudrý & Devillers,  
59 2020; Cull, 2021). Though sites implement some quality control, the volume of entries prevents more  
60 detailed scrutiny of the data. If the data are of high enough quality, iNaturalist could be used as a digital  
61 alternative to physical collections for rigorous morphological comparisons (Mugford et al., 2021). These  
62 tasks would require consistently labeled images, no duplicate entries, correct geo-tags, and image  
63 quality high enough to permit accurate identification and comparison (Hochmairid, Scheffrahn, Basille,  
64 & Booneid, 2020). Currently, researchers and educators must evaluate entry quality manually. Given the  
65 millions of observations recorded for any given taxonomic group, this process is time and resource  
66 intensive and represents the biggest barrier for using crowd-sourced data. This study seeks to address  
67 this barrier by providing a pipeline to quantify and assess the quality of data currently available on  
68 iNaturalist using the order Araneae as a case study (Figure 1). Fully assessing datasets acquired from  
69 iNaturalist (and similar databases) can illuminate areas that may still need to improve and how the  
70 research community may create a more accurate and robust database.

71

## METHODS AND MATERIALS

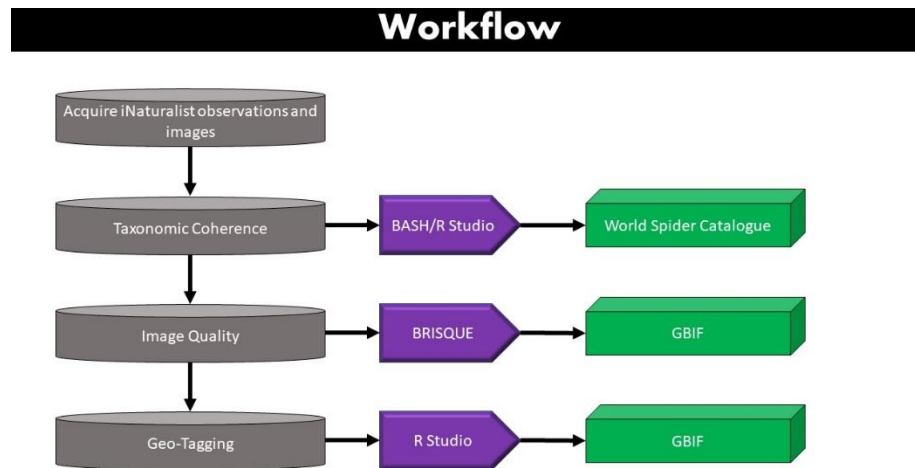

Figure 1: Overall workflow. iNaturalist observations taxonomic coherence were evaluated using an original bash code and R studio using the World Spider Catalogue taxonomies as reference. The image quality was scored using the MatLab program BRISQUE, which is a no-reference image quality program. Images from GBIF were also scored using BRISQUE. Finally, the geo-tagged locations of the observations were compared to the occurrences at the genus and species level (if present for the observation) using a confusion matrix.

### 72 *Data Acquisition*

73 I applied the pipeline to observations from iNaturalist for the order Araneae as a case study. Spiders

74 constitute a valuable, yet understudied order of invertebrates (Nyffeler, Sterling, & Dean, 1994;

75 Schwerdt, Elena de Villalobos, & Miles, 2018). Difficulties associated with locating, observing, and

76 collecting spider specimens partly account for the deficit of data on species ranges and diversity, and the

77 lack of information on habitat and behavior (Cardoso, Erwin, Borges, & New, 2011). Community science

78 initiatives (projects that partner researchers with community volunteers) help researchers expand

79 arachnid research while also providing public outreach and education (Cull, 2021).

80 While this pipeline was originally meant to be used with iNaturalist, its potential use with other

81 databases necessitates acquiring images and their accompanying metadata before using the pipeline, as

82 each database varies on how users access data. For the Araneae case study, I searched for and

83 downloaded observations for each family under the order Araneae on iNaturalist on July 21, 2021

84 ('iNaturalist', 2014). I then searched for and downloaded observations classified only to the order level. I  
85 obtained GBIF occurrence coordinates and image URLs using the Search Occurrences function for the  
86 order Araneae ('GBIF.org', 2021)

87 The pipeline uses an input file in a .csv format. The input file for iNaturalist observations and GBIF  
88 occurrences must include columns for: observation ID, time of observation, date of observation, time  
89 zone, latitude, longitude, the images' current grade label, the image URLs, taxonomic guess provided by  
90 the machine learning algorithm, and taxonomic labels at the family, genus, and species level. The input  
91 file is then read into Rstudio for analysis. The resulting dataframe for iNaturalist observations is then  
92 queried for duplicate observations. Observations are considered duplicate entries if two observations  
93 have the same time of observation and location (Hochmairid et al., 2020).

94 iNaturalist does not currently provide a method that allow users to bulk download images. Instead, the  
95 image URLs are extracted from the input file into a separate URL list. Images are downloaded using the  
96 list of URLs with an original bash script included in the pipeline (RStudio, 2020).

### 97 *Taxonomic Consistency*

98 To evaluate the consistency of the taxonomic data from iNaturalist, a taxonomic reference file is  
99 needed. Several databases exist that can provide necessary taxonomic information on specific groups of  
100 animals, such as The Global Lepidoptera Names Index (Beccaloni et al., 2003), The Mammal Diversity  
101 Database (Zenodo, 2022), and The Reptile Database (Uetz & Hallermann, 2021). I downloaded an  
102 updated species list from World Spider Catalogue (WSC) on July 30<sup>th</sup>, 2021, as a taxonomic reference for  
103 the case study. WSC collects arachnology literature and publications and maintains updated taxonomic  
104 lists (Natural History Museum Bern, 2019). The input file for taxonomic reference should include  
105 columns for the highest classification being used in the pipeline, with consequent columns for all lower

106 classifications (Supplemental 2). Taxonomic identification for the highest order of classification and all  
107 subsequent lower classifications are compared to the taxonomic reference file.  
108 The percentage of observations that include taxonomic labels at each level of classification and the  
109 consistency of the assigned taxonomic names for each observation are then analyzed. If the  
110 identification given for an observation matches the recognized taxonomic names at the appropriate  
111 level and was consistent with accepted higher order names as they appear on the taxonomic reference  
112 file, then it is recorded as correct. Correct labels are given one point per name. If the name on the  
113 observation is either entered incorrectly, at the incorrect taxonomic level (such as the genus taxonomy  
114 being recorded as the species) or does not align with the accepted higher order labels (i.e., the genus  
115 does not belong to the family assigned to the observation) it is recorded as incorrect. Incorrect or  
116 missing labels are given a score of zero. The awarded points are then divided by the number of  
117 taxonomic levels, to produce an overall score (Figure 2).

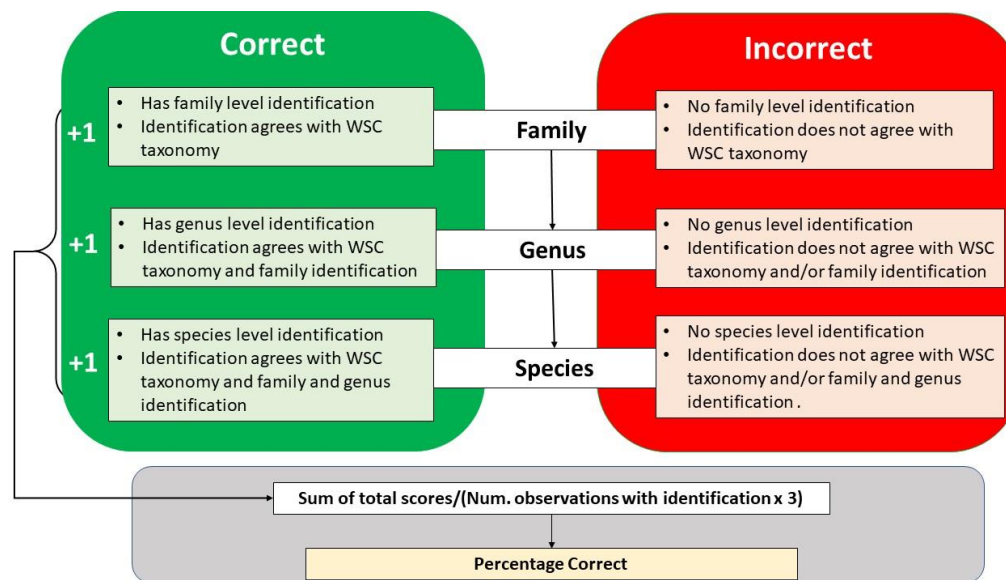

Figure 2: Taxonomic consistency workflow. Each observation could earn a maximum of three-points. Points were awarded as follows: iNaturalist observations were checked for family-level identification. If a family level identification was present, and the taxon given agreed with the current World Spider Catalogue (WSC), the observation was awarded one-point. The observation was checked for a genus-level identification. If one was present, the given genus taxon was checked for agreement with the WSC genera and the family taxon. If these conditions were met, the observation was awarded an additional point. Lastly, observations were checked for species-level identification. If present, the given species taxon was

118 *Geo-Tagging*

119 To assess geo-tagging data of observations, coordinates from iNaturalist and GBIF are filtered through  
120 the *Clean Coordinates* R-package, which removes coordinates with common errors found in biological  
121 and paleontological datasets (Zizka et al., 2019). These errors include location at museum and zoo  
122 facilities, zero set coordinates, and coordinates that fall outside of any coordinate values, such as a  
123 latitude large than 90° (Zizka et al., 2019).

124 A list of genera and species for observations from GBIF and iNaturalist are created and cross-referenced  
125 so only families, genera, and species that appear on both remain. A subset of coordinate data for both  
126 GBIF and iNaturalist are created, first by genera then by species. Comparisons are made at the family,  
127 genus, and species level. A Raster file is created using GBIF occurrences in the R-program Raster and the  
128 raster polygon is divided into a grid GBIF and iNaturalist coordinates are converted to spatial points and  
129 placed on the grid. A confusion matrix is created using the *confmat* function in the RStudio package  
130 GMDH2 (Dag, Karabulut, Alpar, & Kasikci, 2021) based on the results of each cell using the following  
131 parameters from Austen et al. (2018) (Figure 3):

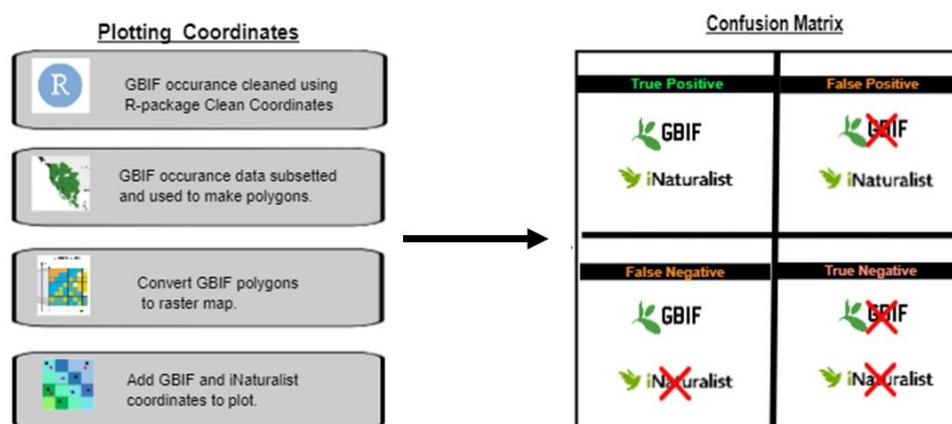

Figure 3: Geo-tagging Workflow. Plotting Coordinates: GBIF occurrence records was cleaned using the R-package, *Clean Coordinates*. Comparisons of occurrence records (including latitudes and longitudes) for iNaturalist observations were made using the family-level of identification, the genus-level of identification, and the species-level of identification. For each taxon rank, occurrence data was obtained from the Global Biodiversity Information Facility (GBIF) for the order Araneae and subsetting in Rstudio by taxon rank. The subsetting occurrence records were used to create polygon maps, that were then converted to raster maps. GBIF and iNaturalist occurrence records were added to the cells of the raster map. A confusion

- 133 • True Positive: GBIF observation is present and iNaturalist
  - 134 • True Negative: No observations present
  - 135 • False Positive: iNaturalist observation present but not GBIF
  - 136 • False Negative: GBIF observation present but not iNaturalist
- 137 Accuracy and precision scores from the confusion matrix are reported for each taxonomic level.

### 138 *Image Quality*

139 Image quality is assessed using the MatLab program BRISQUE. For the Araneae case study, I used  
140 MatLab *Batch Image Processing* to upload and run both the iNaturalist and GBIF images (Mittal et al.,  
141 2012). BRISQUE scores the distortion in an image without the use of a reference image, to create a final  
142 quality score based on a comparison between the image and a default set of natural images (which are  
143 images captured directly from a camera without any post processing) with similar distortions (Mittal et  
144 al., 2012). Images are evaluated and assigned a score that usually falls between 0 (higher quality) to 100  
145 (lower quality) (Figure 4). Not all observations from iNaturalist included images with copyright  
146 permissions that allow them to be downloaded and some observations included multiple images, each  
147 with an individual score. Images are grouped by the highest shared taxonomic order and an average  
148 score is reported. This process is repeated for images with identification at lower taxonomic levels and a  
149 mean average score is calculated.

150 In addition to an overall average score, the image scores for the Araneae dataset are given at the family,  
151 genus, and species level. To determine if a relationship existed between the level of taxonomic  
152 identification and the BRISQUE image score, I examined the normality of the data using Q-Q plots,  
153 residual plots, and a Shapiro-Wilks test. As the data were non-normally distributed, I used a Kruskal-  
154 Wallace test to compare the scores from the GBIF images, images with at most a family identification,  
155 genus identification, and species identification. All means are presented with  $\pm 1$  standard error of the  
156 mean.



157 RESULTS

158 *Data Acquisition*

159 For the order Araneae, I found 156,842 downloadable observations on iNaturalist. I found 78,310 unique  
160 observations for the order Araneae on iNaturalist. Of the 129 families in the order Araneae recognized  
161 by the WSC, 122 had observations (Natural History Museum Bern, 2019). I found no observations for  
162 Araneidae, Barychelidae, Huttoniidae, Mecicobothriidae, Myrmecicultoridae, Synaphridae, and  
163 Tetrablemmidae. Users of iNaturalist identified 49.91% of observations to at least the family level and so  
164 could be found searching by a specific family. Agelenidae (“Grass spiders”) had the most observations,  
165 with 41,716. Mean number of observations per family was  $259.56 \pm 19.86$ . Archoleptonetidae and  
166 Penestomidae both had only one observation.

167 *Taxonomic Consistency*

168 I found 158,129 of the 156,842 downloadable observations with a family level identification, of which  
169 79.15% were consistent with the taxonomic families listed on WSC. 99.86% of the 58,241 observations  
170 identified to the genus level and 99.74% of the 27,500 observations identified to the species level were  
171 consistent with established taxonomic names.

172 I removed 2,170 of 425,950 records after cleaning the coordinates. iNaturalist observations with a family  
173 level identification were 49.95% accurate and 99.90% precise. I found comparable results at the genus  
174 and species levels, with the genus level resulting in an accuracy of 49.97% and precision of 99.85%, and  
175 the species level resulting in an accuracy of 63.10% and precision of 99.87%.

176 *Image Quality*

177 BRISQUE evaluated 118,834 images on MatLab. Mean image quality score was  $29.94 \pm 0.03$  (n =  
178 115,093). Images of Periegopidae received the highest average BRISQUE score (n = 4, mean = 41.01  
179  $\pm 1.16$ ), with a higher score indicating lower quality images. The family with the highest score and > 10  
180 observations was Leptonetidae (n = 13, mean =  $39.21 \pm 1.77$ ). Hexurellidae had the lowest (n = 3, mean =  
181  $15.76 \pm 4.05$ ). The family with the lowest score and > 10 observations was Dipluridae (n = 175, mean =  
182  $24.59 \pm 0.81$ ).

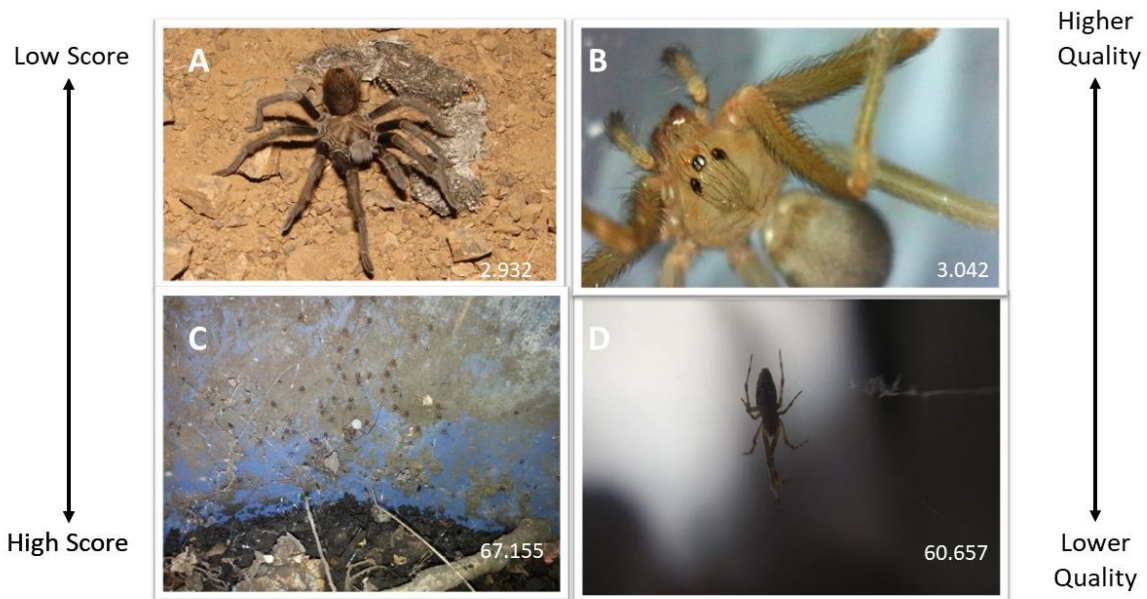

Figure 4: BRISQUE Image Quality. A comparison between images with a low BRISQUE score (A and B) and high BRISQUE scores (C and D). A was given a BRISQUE score of 2.932 and B was given a score of 3.042, while C was given a BRISQUE score of 67.155 and D was given a BRISQUE score of 60.657. A side-by-side comparison of these images demonstrates how visual assessment of image quality can be inaccurate and subject to individual preference and vision. Providing a BRISQUE score helps to quantify the quality of an image used. [A: (Dunbar, 2014), B: (Miseroy, 2017), C: (Cuarenta, 2017), D: (veravilla, 2017).]

183

184

## DISCUSSION

185 Here, I present a method for assessing the metadata and image quality for data acquired from  
186 iNaturalist, a crowd-sourced database. Using the order Araneae, both the metadata and images  
187 associated with observations in iNaturalist demonstrate that this platform provides a diverse dataset for

188 spiders (Order Araneae). This data assessment method was able to determine that, with few exceptions,  
189 nearly every family in the order had some level of representation on iNaturalist. Automizing a check of  
190 taxonomic labels against accepted taxonomic names permits quick removal of occurrences with  
191 inconsistent labels. Additionally, it provides researchers that use these data to report a quantifiable  
192 assessment of the taxonomic consistency in a dataset.

193 Similarly, comparing geo-tagging data from iNaturalist observations to GBIF occurrences allows for a  
194 quantifiable evaluation of that data via the confusion matrix results. Another benefit to using this  
195 pipeline to compare geo-tagging data is the insight into the accuracy of the observations taxonomic  
196 labels it can provide. Observations that fall outside the raster generated by the occurrence data from  
197 GBIF can be seen as outside the area where that organism has previously been shown to live. This could  
198 also aid in determining if the iNaturalist taxonomic labels are accurate. Conversely, this method of  
199 evaluating geo-tagging could help identify if a species was observed within a new range. While an  
200 occurrence could fall outside of the GBIF raster for reasons unrelated to range expansion, once the  
201 raster polygon is created using the GBIF occurrences, iNaturalist observations outside of the raster are  
202 easily separated from the dataset and further investigated.

203 One major concern with using publicly sourced biodiversity photos is that without knowing the quality of  
204 the images, reproducibility is difficult. iNaturalist categorizes images as either “research grade”, “needs  
205 ID”, or “NA.” iNaturalist’s current method for assigning an observation as “research-quality” or not  
206 “research quality” requires that an observation reach a threshold of three votes from users to confirm  
207 an identification. Images currently marked “needs ID” could receive the consensus on their taxonomic  
208 idea and be relabeled “research grade.” I found relatively consistent image quality across families and  
209 between research grade and non-research grade observations (“needs ID” and “NA”). While this system  
210 of categorization does provide some information on the quality of an image, presenting a mean score  
211 for image sets on databases may help clarify the results researchers obtain using iNaturalist (or other

212 database) images, especially in the cases of machine learning programs. The method presented for  
213 image assessment could also be used to set a threshold score, allowing only images that meet a specific  
214 quality standard to be included in a set of images.

215 Additionally, this study highlights the importance of using quantifiable, image quality assessment tools  
216 like BRISQUE, especially for methods that use images for morphological evaluation of computer learning  
217 software for identification. While not conducted here, it would be beneficial to perform a BRISQUE  
218 assessment on any image used for research and to report the score or average score of images,  
219 especially when sourced from public collections. Image quality could impact evaluations of coloring and  
220 morphological structures. From a visual assessment of an image, the quality of that image may not be  
221 obvious. Additionally, visual assessment of an image may be subject to personal bias or visual acuity  
222 (Wang et al., 2004). Providing a quantitative score, such as a BRISQUE does, permits a uniform  
223 understanding of the images being used. In the future, it would be beneficial to compare the BRISQUE  
224 scores of images obtained from iNaturalist to those on image databases that only host published  
225 images, such as GBIF.

226 One drawback to using crowd-sourced observations, however, is how usage patterns could affect the  
227 metadata and number of high-quality images available for a specific group of animals. For example,  
228 differences in the number of observations per family of Araneae might result from geographic areas  
229 with a higher or lower user number of iNaturalist users, variation in numbers of people with access to  
230 camera phones or reflect actual relative abundances.

231 Increasing the number of observations at the family level or lower is the best way to increase the  
232 number of images and amount of metadata available to researchers from iNaturalist, since a lack of  
233 identification, lack of consensus for that identification, or no lower order identification represent the  
234 most common deficits for most observations. To help increase the diversity and quality of the

235 observations, researchers should employ methods to contribute to iNaturalist, such as educational  
236 initiatives that engage students with the platform and encourage them to contribute images or by  
237 making a habit of offering taxonomic identifications to images that require taxonomic identification.  
238 For researchers to become more engaged with iNaturalist, however, some changes may be necessary.  
239 For example, limits on how many observations could be downloaded at one time make broad studies,  
240 such as the one using Araneae, more time consuming than necessary. iNaturalist has recently launched  
241 an Amazon Web Services (AWS) platform, but this platform does not include the image files from the  
242 database, which limits the type of analyses researchers can conduct. In addition to a more economical  
243 method to bulk download images, incorporating an image assessment algorithm like BRISQUE into the  
244 metadata would greatly increase the utility of iNaturalist to researchers. Providing a BRISQUE score  
245 would allow users to filter downloads for a specific image quality without having to run the algorithm on  
246 large image datasets. Finally, while not an issue for iNaturalist observations, problems exist in  
247 downloading images from GBIF in bulk and keeping the image file names associated with the taxon.  
248 Other database may experience similar problems.

249 Several databases are available for researchers to access occurrence data and images (Cull, 2021a;  
250 Mason Heberling et al., n.d.; Moudrý & Devillers, 2020b; Shirey et al., 2019). iNaturalist provides a user-  
251 friendly, crowd-sourced database of images with the potential for broad research applications  
252 (Hochmairid et al., 2020; Mesaglio & Callaghan, 2021; Nugent, 2020). It should be noted that any  
253 research that uses images or metadata from iNaturalist should include methods that screen the data for  
254 duplicates, incorrectly geo-tagged observations, and image quality.

255 The usefulness of this pipeline may be limited for systems with few observations on iNaturalist or GBIF  
256 (who must have at least 3 occurrences to generate a raster polygon). Systems that lack a taxonomic

257 database could also present a challenge, since this would require the user to generate the taxonomic  
258 reference file from scratch.

259 Taken together, this study demonstrates that iNaturalist can provide large metadata and image datasets  
260 for research. This pipeline can be used to assess the taxonomic consistency, relationship to known  
261 distributions, and image quality of large datasets of crowd-sourced data. This is a reliable method to  
262 quickly analyze the data quality for specific taxa. With appropriate quality-controls in place, the wealth  
263 of knowledge supplied through crowd-sourced biodiversity databases can be more reliably used for  
264 scientific discovery.

#### 265 Acknowledgements

266 I would like to thank R.A.Hufbauer, R.P. Reading, and J .H. for providing comments on this manuscript.

#### 267 Conflict of Interest Statement

268 I have no conflicts of interest to disclose.

#### 269 Authors Contribution

270 The author confirms sole responsibility for the following: study conception and design, data collection,  
271 analysis and interpretation of results, and manuscript preparation.

#### 272 Data Availability

273 The R markdown code, iNaturalist metadata, GBIF metadata, and taxonomic data from World Spider  
274 Catalog can be found at [https://github.com/jackiebillotte/Observation\\_Database\\_Assesment](https://github.com/jackiebillotte/Observation_Database_Assesment) along with  
275 formatted examples of the data used.

#### 276 References

277 Agrin, N., Kline, J., & Ueda, K. (2014). *Final Project Write-up: iNaturalist*. Berkley, California.

- 278 Beccaloni, G., Scoble, M., Kitching, I., Simonsen, T., Robinson, G., Pitkin, B., ... (Editors). (2003). The  
279 Global Lepidoptera Names Index (LepIndex). Retrieved 9 February 2022, from  
280 <https://www.nhm.ac.uk/our-science/data/lepindex/lepindex/>
- 281 Cardoso, P., Erwin, T. L., Borges, P. A. V., & New, T. R. (2011). The seven impediments in invertebrate  
282 conservation and how to overcome them. *Biological Conservation*, *144*, 2647–2655.  
283 doi:10.1016/j.biocon.2011.07.024
- 284 Cull, B. (2021). Potential for online crowdsourced biological recording data to complement surveillance  
285 for arthropod vectors. *PLoS ONE*, *16*(4 April). doi:10.1371/journal.pone.0250382
- 286 Dag, O., Karabulut, E., Alpar, R., & Kasikci, M. (2021). GMDH2: Binary Classification via GMDH-Type  
287 Neural Network Algorithms. CRAN.
- 288 Cuarenta, D.I. (2017, May 13). Genus Scytodes [Digital image]. Retrieved from  
289 <https://www.inaturalist.org/observations/6602748>
- 290 Dunbar, E. (2014, September 28). Desert Tarantula (*Aphonopelma iodium*) [Digital image]. Retrieved from  
291 <https://www.inaturalist.org/observations/908587>
- 292 GBIF.org. (n.d.). *GBIF Occurrence Download*. Retrieved from <https://doi.org/10.15468/dl.25bx5t>
- 293 Hochmairid, H. H., Scheffrahn, R. H., Basille, M., & Booneid, M. (2020). Evaluating the data quality of  
294 iNaturalist termite records. doi:10.1371/journal.pone.0226534
- 295 iNaturalist. (2014). *Reference Reviews*, *28*(8), 36–38. doi:10.1108/rr-07-2014-0203
- 296 Kaldari, R. (2019). New records of the exotic jumping spider *Pseudeuophrys erratica* (Araneae:  
297 Salticidae: Euophryini) in the United States. *Peckhamia* *188.1*, (August), 1–3.
- 298 Mesaglio, T., & Callaghan, C. T. (2021). An overview of the history, current contributions and future

- 299 outlook of iNaturalist in Australia. *Wildlife Research*. doi:10.1071/WR20154
- 300 Michonneau, F., & Paulay, G. (2014). Using iNaturalist to engage the public and learn more about  
301 echinoderms, *30*(1), 29–31. Retrieved from <http://dx.doi.org/10.6084/m9.figshare.1040435>
- 302 Miseroy, O. (2017, October). Recluse Spiders [Digital image]. Retrieved from  
303 <https://www.inaturalist.org/observations/8265914>
- 304 Moudrý, V., & Devillers, R. (2020). Quality and usability challenges of global marine biodiversity  
305 databases: An example for marine mammal data. *Ecological Informatics*, *56*(December 2019).  
306 doi:10.1016/j.ecoinf.2020.101051
- 307 Mugford, J., Moltchanova, E., Plank, M., Sullivan, J., Byrom, A., & James, A. (2021). Citizen science  
308 decisions: A Bayesian approach optimises effort. *Ecological Informatics*, *63*, 101313.  
309 doi:10.1016/j.ecoinf.2021.101313
- 310 Natural History Museum Bern. (2019). NMBE - World Spider Catalog. doi:10.24436/2
- 311 Nyffeler, M., Sterling, W. L., & Dean, A. A. (1994). *How Spiders Make a Living*. *Environ. Entomol* (Vol. 23).  
312 Retrieved from <https://academic.oup.com/ee/article/23/6/1357/2394580>
- 313 RStudio, T. (2020). RStudio: Integrated Development for R. *RStudio*, PBC. Boston, MA. Retrieved from  
314 <http://www.rstudio.com/>
- 315 Ryan, S. F., Adamson, N. L., Aktipis, A., Andersen, L. K., Austin, R., Barnes, L., ... Dunn, R. R. (2018). The  
316 role of citizen science in addressing grand challenges in food and agriculture research. *Proceedings*  
317 *of the Royal Society B: Biological Sciences*, *285*(1891). doi:10.1098/rspb.2018.1977
- 318 Schwerdt, L., Elena de Villalobos, A., & Miles, F. P. (2018). Spiders as potential bioindicators of mountain  
319 grasslands health: the Argentine tarantula *Grammostola vachoni* (Araneae, Theraphosidae).



- 320 *Wildlife Research*, 45(1), 64. doi:10.1071/wr17071
- 321 Uetz, P., & Hallermann, J. (2021). The Reptile Database. Retrieved 9 February 2022, from [https://reptile-](https://reptile-database.reptarium.cz/)
- 322 [database.reptarium.cz/](https://reptile-database.reptarium.cz/)
- 323 veravilla (2017, May 10). *Uloborus diversus* [Digital image]. Retrieved from
- 324 <https://www.inaturalist.org/observations/9109015>
- 325 What is GBIF? (2021). *GBIF: The Global Biodiversity Information Facility*. Retrieved from [gbif: The Global](https://www.gbif.org/)
- 326 [Biodiversity Information Facility](https://www.gbif.org/)
- 327 Wilson, J. S., Pan, A. D., David, , General, E. M., & Koch, J. B. (2020). More eyes on the prize: an
- 328 observation of a very rare, threatened species of Philippine Bumble bee, *Bombus irisanensis*, on
- 329 iNaturalist and the importance of citizen science in conservation biology. *Journal of Insect*
- 330 *Conservation*, 24, 727–729. doi:10.1007/s10841-020-00233-3
- 331 Zenodo. (2022). Mammal Diversity Database (Version 1.8). Retrieved 9 February 2022, from
- 332 <https://www.mammaldiversity.org/>
- 333
